# Supplementary material for: Low expression of PDGFR-β impairs the blood-brain barrier and accelerates cellular aging in the hippocampal region
Source: Research Square preprint supplement (doi:10.21203/rs.3.rs-6690011/v1), 2025-06-03
Supplement: Supplementary file 1 [file 12f1fec82fe8b35cc47ee3a3.docx]

Table 1：Antibodies list

| Antibodies | Experiment | Dilution ratio | Source | Identifier |
| --- | --- | --- | --- | --- |
| PDGFR-β | WB、IF | 1:1000 | Abmart | T55135S |
| NG 2 | WB、IF | 1:100 | Abmart | TD12589S |
| CD31 | IF | 1:100 | Servicebio | GB11063 |
| ZO-1 | WB | 1:100 | Servicebio | GB115686 |
| Fibronectin | WB | 1:100 | Servicebio | GB152093 |
| Vimentin | WB | 1:100 | Servicebio | GB11192 |
| Occludin | WB | 1:100 | CST | 91131 |
| Phospho-P53 | WB | 1:100 | Zenbio | R380837 |
| P53 | WB | 1:100 | Zenbio | 345567 |
| 53BP1 | WB | 1:100 | Zenbio | R381816 |
| Ki67 | IF | 1:100 | abcam | Ab16667 |
| Dylight 594, Goat Anti-Rabbit IgG | IF | 1:200 | Abbkine | A23420 |
| Dylight 488, Goat Anti-Rabbit IgG | IF | 1:200 | Abbkine | A23220 |
| Goat Anti-Mouse IgG/Cy3 | IF | 1:200 | Bioss | bs-0296G |
| Goat Anti-Mouse IgG (H+L) HRP | IHC | 1:200 | Bioss | bs-0296G-SA |
| Goat Anti-Mouse IgG (H+L) HRP | WB | 1:10000 | Proteintech | SA00001-1 |
| Goat Anti-Rabbit IgG(H+L) HRP | WB | 1:10000 | Proteintech | SA00001-2 |
