# Supplementary material for: Low expression of PDGFR-β impairs the blood-brain barrier and accelerates cellular aging in the hippocampal region
Source: Research Square preprint supplement (doi:10.21203/rs.3.rs-6690011/v1), 2025-06-03
Supplement: Supplementary file 2 [file 4886a3ff8222d95ff93a12d6.docx]

Supplementary materials

Low expression of PDGFR-β impairs the blood-brain barrier and accelerates cellular aging in the hippocampal region

Gao Fulina Chen Haichaob Zhang Lea Gu Chenga Zhu Xiaolinga Nie Yutinga Zhang Yamin a*

*a Department of Neurology, Gansu Provincial Hospital, Lanzhou, Gansu Province, China*

*b School of Basic Medical Sciences, Lanzhou University, Lanzhou, Gansu Province, China*

* Corresponding author: Zhang Yamin, Department of Neurology, Gansu Provincial Hospital, No.204 of Donggang West Road, Lanzhou, Gansu Province 730000, China .E-mail : [gaofulin990@126.com](mailto:gaofulin990@126.com)

**The full length uncropped original western blots**


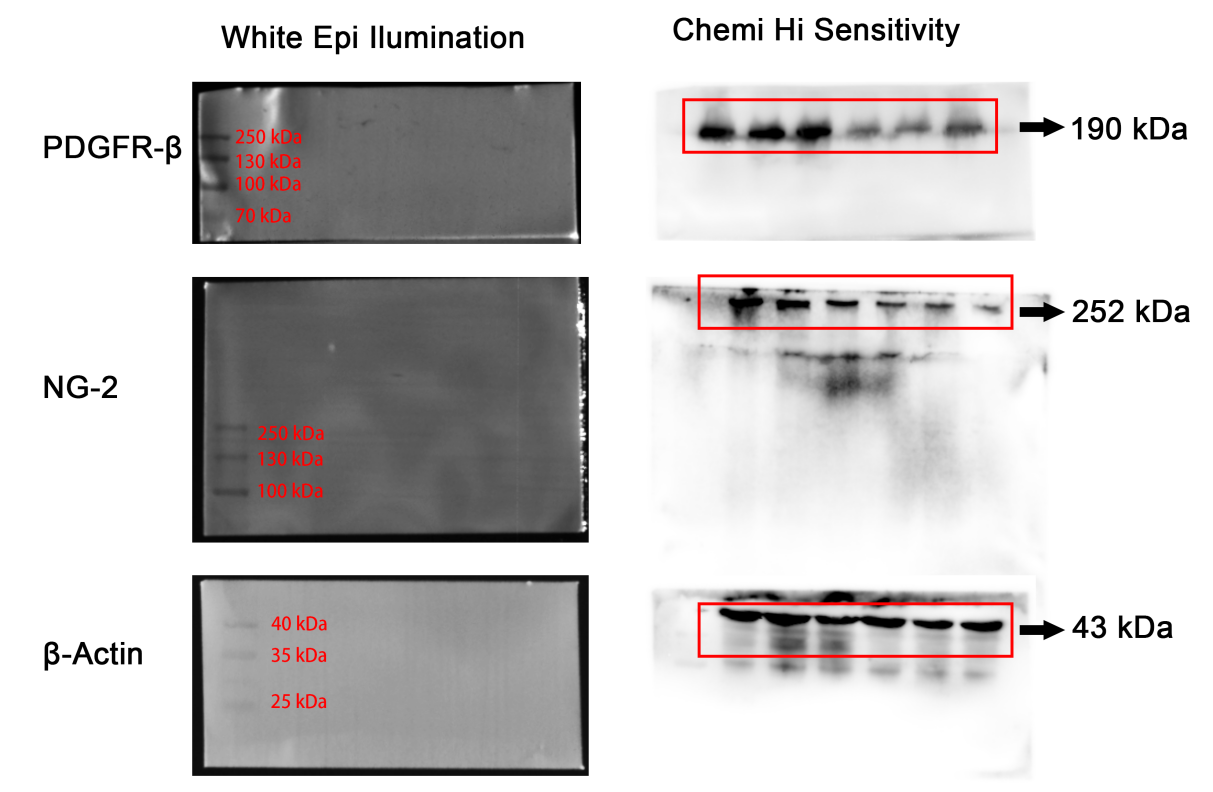


Extended Data Fig 1. Figure 1 shows the full-length, uncropped original Western blot image. The left side displays the bright-field image of the protein marker, while the right side shows the chemiluminescent imaging of the protein bands. The red box indicates the region selected for the cropped Western blot, and the arrow points to the predicted band size of the protein.


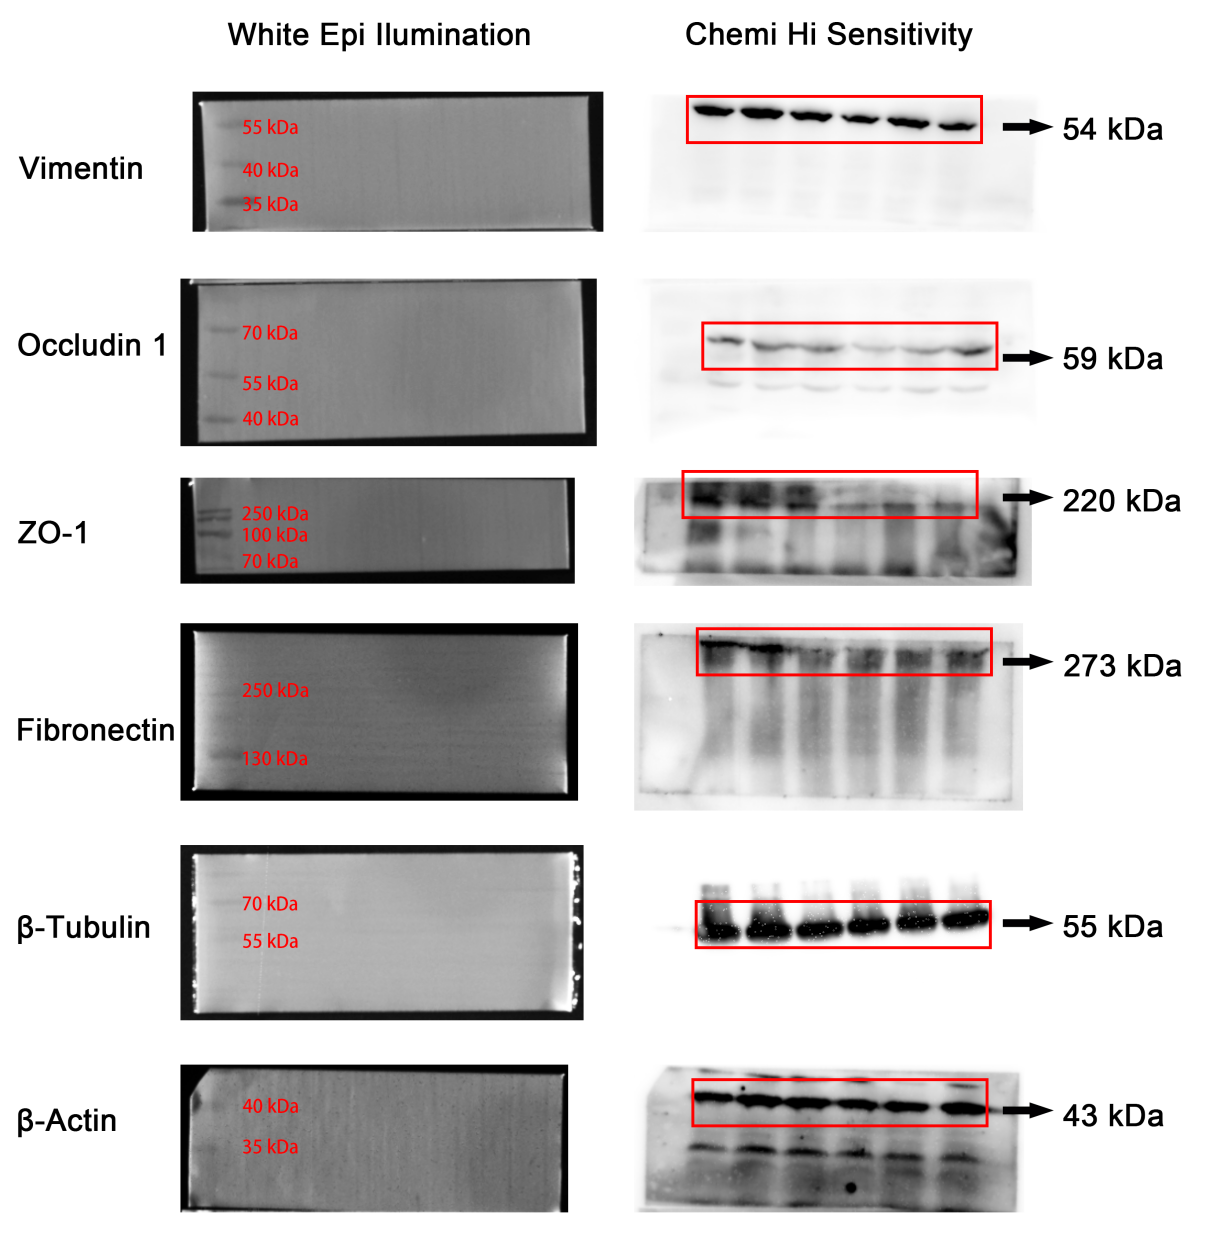


Extended Data Fig 2. Figure 3 shows the full-length, uncropped original Western blot image. The left side displays the bright-field image of the protein marker, while the right side shows the chemiluminescent imaging of the protein bands. The red box indicates the region selected for the cropped Western blot, and the arrow points to the predicted band size of the protein.


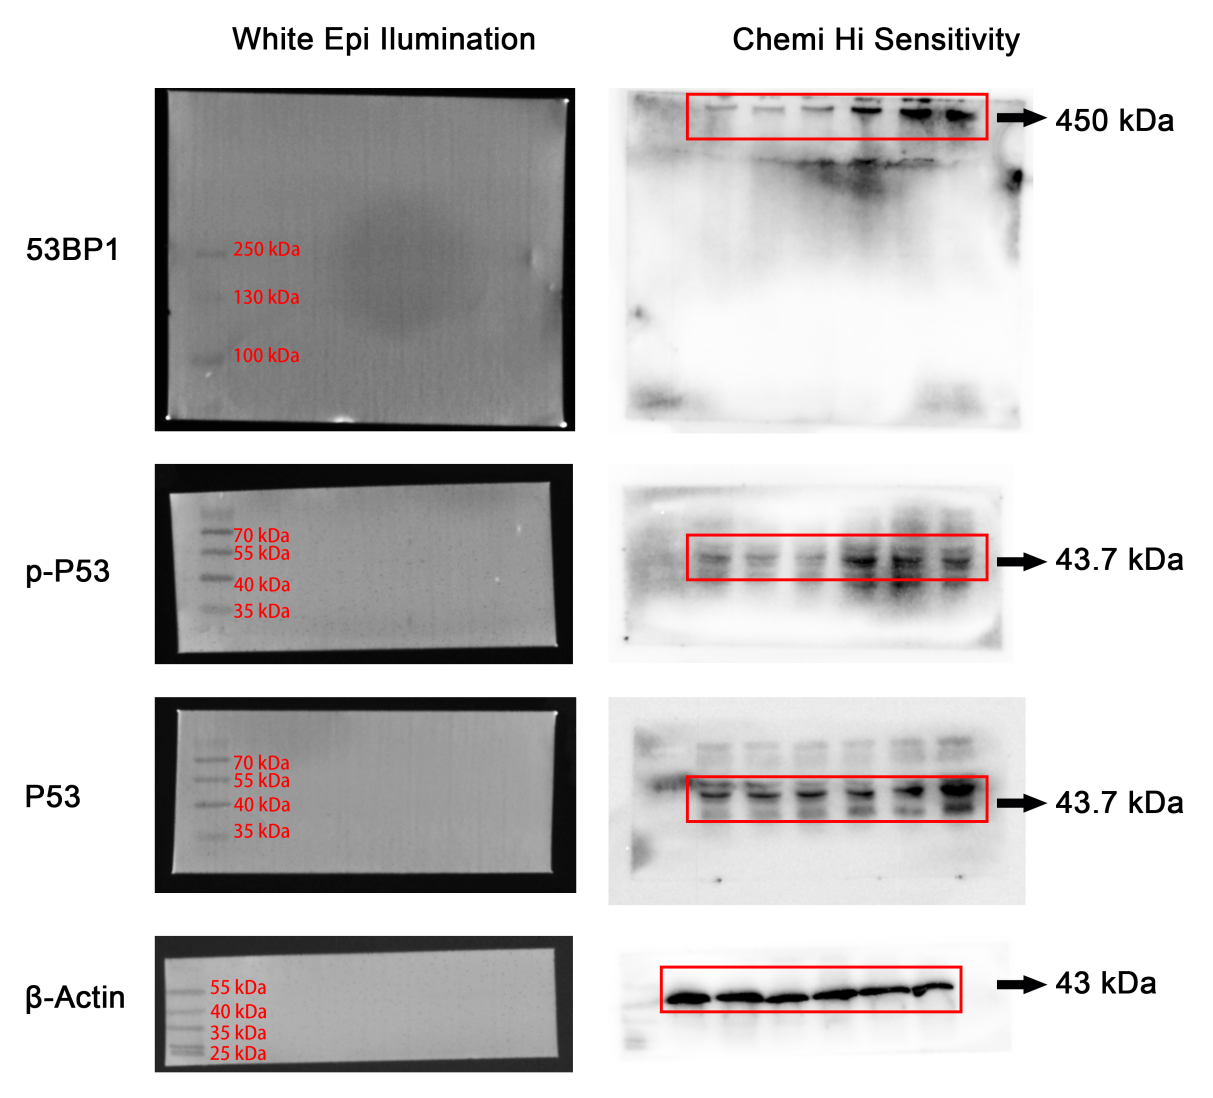


Extended Data Fig 3. Figure 4 shows the full-length, uncropped original Western blot image. The left side displays the bright-field image of the protein marker, while the right side shows the chemiluminescent imaging of the protein bands. The red box indicates the region selected for the cropped Western blot, and the arrow points to the predicted band size of the protein.

**Quantified numerical data**

Extended Data table 1. **Figure 1.B Statistical Results of Western Blot (PDGFR-β/β-Actin).**

| **Wild type** | **PDGFR-β+/-** |
| --- | --- |
| **1.288470501** | **0.644316807** |
| **1.105184696** | **0.636778815** |
| **1.102594874** | **0.578348053** |

Extended Data table 2. **Figure 1.C Statistical Results of Western Blot (NG-2/β-Actin).**

| **Wild type** | **PDGFR-β+/-** |
| --- | --- |
| **0.73569122** | **0.367658394** |
| **0.652500445** | **0.36692438** |
| **0.558162262** | **0.270930028** |

Extended Data table 3. **Figure 1.E Statistical results of PDGFR-β immunofluorescence.**

| **Wild type** | **PDGFR-β+/-** |
| --- | --- |
| **33.32841924** | **27.80800000** |
| **34.28230507** | **25.04657972** |
| **31.84024641** | **31.70521591** |
| **32.78399927** | **26.64042217** |
| **30.05861372** | **27.95109033** |
| **32.29602448** | **23.38018714** |
| **37.96469402** | **23.48383363** |
| **33.47014269** | **30.9261135** |
| **32.88388613** | **30.62725824** |
| **35.84437378** | **30.74563245** |
| **35.45345778** | **29.45748568** |
| **32.57345689** | **32.45645440** |

**★ Six mice per group. For each mouse, three random sections of the left hippocampus and three of the right hippocampus were taken, and the average value was calculated for each.**

Extended Data table 4. **Figure 1.G Statistical results of NG-2 immunofluorescence.**

| **Wild type** | **PDGFR-β+/-** |
| --- | --- |
| **8841553.899** | **1473474.853** |
| **16738427.680** | **1295333.497** |
| **11206966.040** | **1073246.973** |
| **8979018.738** | **1264099.742** |
| **5679862.605** | **1334557.281** |
| **8581333.140** | **2143729.437** |
| **8954503.872** | **6488126.803** |
| **8074692.585** | **1530857.798** |
| **6635397.588** | **1988650.214** |
| **5475753.650** | **1784363.783** |
| **7015105.617** | **1572493.941** |
| **8812136.060** | **2783114.532** |

**★ Six mice per group. For each mouse, three random sections of the left hippocampus and three of the right hippocampus were taken, and the average value was calculated for each.**

Extended Data table 5. **Figure 2.B Statistical results of IgG area.**

| **Wild type** | **PDGFR-β+/-** |
| --- | --- |
| **114.415** | **191.946** |
| **98.672** | **182.537** |
| **77.672** | **166.682** |
| **108.783** | **198.783** |
| **92.873** | **220.983** |
| **103.456** | **185.345** |

**★ Three mice per group. For each mouse, three random sections of the left hippocampus and three of the right hippocampus were taken, and the average value was calculated for each.**

Extended Data table 6. **Figure 2.C Bilateral hippocampal NaF uptake.**

| **Wild type** | **PDGFR-β+/-** |
| --- | --- |
| **425.4640** | **543.4546** |
| **405.3253** | **643.3645** |
| **396.3543** | **502.4643** |

Extended Data table 7. **Figure 2.D Bilateral hippocampal Even Blue uptake.**

| **Wild type** | **PDGFR-β+/-** |
| --- | --- |
| **164.345** | **204.243** |
| **184.352** | **194.436** |
| **174.346** | **225.465** |

Extended Data table 8. **Figure 3.B Statistical Results of Western Blot (Fibronectin/β-Actin).**

| **Wild type** | **PDGFR-β+/-** |
| --- | --- |
| **0.536994134** | **0.208876353** |
| **0.495841364** | **0.264973437** |
| **0.353413690** | **0.286789629** |

Extended Data table 9. **Figure 3.C Statistical Results of Western Blot (Occludin/β-Actin).**

| **Wild type** | **PDGFR-β+/-** |
| --- | --- |
| **0.519004882** | **0.269050642** |
| **0.554323059** | **0.425959574** |
| **0.599974390** | **0.408785596** |

Extended Data table 10. **Figure 3.D Statistical Results of Western Blot (ZO-1/β-Actin).**

| **Wild type** | **PDGFR-β+/-** |
| --- | --- |
| **0.760564759** | **0.260747332** |
| **1.217691193** | **0.260567283** |
| **0.897461479** | **0.433429236** |

Extended Data table 11. **Figure 3.E Statistical Results of Western Blot (Vimentin/β-Actin).**

| **Wild type** | **PDGFR-β+/-** |
| --- | --- |
| **1.570986945** | **1.089867719** |
| **1.648987135** | **1.270726206** |
| **1.447880964** | **1.160596439** |

Extended Data table 12. **Figure 3.G Statistical results of the thickness of the vascular basement membrane from electron microscopy.**

| **Wild type** | **PDGFR-β+/-** |
| --- | --- |
| **31.52589767** | **36.80276021** |
| **81.65612421** | **58.92466935** |
| **83.20874066** | **41.11558367** |
| **94.01955147** | **26.02070155** |
| **40.97182289** | **30.90856814** |
| **35.79643473** | **44.70960322** |
| **93.44450834** | **32.59919494** |
| **48.01610121** | **48.70040253** |
| **41.40310523** | **49.16618746** |
| **60.18976423** | **73.31799885** |
| **42.12190914** | **26.45198390** |
| **56.53764487** | **34.64634848** |
| **75.46543684** | **40.79355952** |
| **64.46543328** | **26.34335785** |
| **58.34653666** | **49.86436768** |
| **43.46587246** | **36.65824768** |
| **69.76553656** | **68.64318765** |
| **75.45647542** | **34.47560764** |
| **53.65876147** | **41.46706746** |
| **48.65434373** | **37.76545135** |
| **86.86386543** | **65.56437689** |
| **43.86514676** | **72.75432379** |
| **37.89976506** | **58.78976450** |

**★ Three mice per group. One tissue block was taken from each side of the bilateral hippocampus per mouse. At least three vessels were randomly imaged per tissue block for statistical analysis.**

Extended Data table 13. **Figure 4.B Statistical Results of Western Blot (Phospho-p53/β-Actin).**

| **Wild type** | **PDGFR-β+/-** |
| --- | --- |
| **0.234162542** | **0.522036892** |
| **0.263578757** | **0.601828345** |
| **0.280073027** | **0.432858855** |

Extended Data table 14. **Figure 4.C Statistical Results of Western Blot (p53/β-Actin).**

| **Wild type** | **PDGFR-β+/-** |
| --- | --- |
| **0.371895059** | **0.724122226** |
| **0.353692090** | **0.659431484** |
| **0.505747907** | **0.518170868** |

Extended Data table 15. **Figure 4.D Statistical Results of Western Blot (53BP1/β-Actin)**

| **Wild type** | **PDGFR-β+/-** |
| --- | --- |
| **0.099851238** | **0.401345033** |
| **0.092739656** | **0.555696244** |
| **0.177463477** | **0.637727002** |

Extended Data table 16. **Figure 4.F Statistical results of the number of Ki67-positive cells in the hippocampal region.**

| **Wild type** | **PDGFR-β+/-** |
| --- | --- |
| **12** | **17** |
| **16** | **10** |
| **12** | **14** |
| **14** | **14** |
| **16** | **10** |
| **19** | **9** |
| **14** | **9** |
| **18** | **8** |
| **15** | **8** |
| **16** | **10** |
| **18** | **11** |
| **13** | **9** |

**★ Six mice per group. The number of Ki67-positive cells in the bilateral hippocampal regions was counted separately for each group.**
